# Supplementary material for: Choosing between Ti(ii) and Ti(iii): selective reduction of titanocene dichloride by elemental lanthanides
Source: Royal Society of Chemistry journal article supplement (doi:10.1039/d4dt02004a), 2024-01-01
Supplement: d4dt02004a1.pdf [file d4dt02004a1.pdf]

## Supporting Information

### Choosing between Ti(II) and Ti(III): selective reduction of titanocene dichloride by elemental lanthanides

Guillaume Bousrez,<sup>a,b</sup> Dominique Harakat,<sup>a</sup> Sylviane Chevreux,<sup>a,c</sup> Isabelle Déchamps - Olivier,<sup>a</sup> Florian Jaroschik<sup>\*a,d,e</sup>

<sup>a</sup> *Institut de Chimie Moléculaire de Reims, CNRS UMR 7312, Université de Reims Champagne-Ardenne, BP 1039, 51687 Reims, France*

<sup>b</sup> *Department of Biological and Chemical Engineering, Aarhus University, 8000 Aarhus C, Denmark*

<sup>c</sup> *Institut de Recherche de Chimie Paris, UMR CNRS 8247, Chimie ParisTech, PSL Université, 75005 Paris, France*

<sup>d</sup> *ICGM, Univ. Montpellier, CNRS, ENSCM, 34090 Montpellier, France*

<sup>e</sup> *Email : florian.jaroschik@enscm.fr*

#### **Table of content**

|      |                                                                                              |    |
|------|----------------------------------------------------------------------------------------------|----|
| I.   | SCXRD data                                                                                   | S2 |
| II.  | ESI-MS for bimetallic Ti-Yb complex $\{[\text{Cp}_2\text{TiCl}][\text{LnCl}_3]\text{Cl}\}^-$ | S3 |
| III. | EPR spectra                                                                                  | S4 |

I. SCXRD data

**Table S1.** Crystallographic data of  $[\text{Cp}_2\text{Ti}(\mu\text{-Cl})_2\text{SmCl}_2(\text{THF})_3]\cdot\text{THF}$  (CCDC-2369904)

|                                           |                                                                                      |
|-------------------------------------------|--------------------------------------------------------------------------------------|
| Empirical formula                         | $\text{C}_{12}\text{H}_{19}\text{Cl}_2\text{O}_{1.75}\text{Sm}_{0.5}\text{Ti}_{0.5}$ |
| Formula weight                            | 361.30                                                                               |
| Space group                               | Fdd2                                                                                 |
| a/Å                                       | 22.5099(15)                                                                          |
| b/Å                                       | 44.910(3)                                                                            |
| c/Å                                       | 11.2932(6)                                                                           |
| $\alpha/^\circ$                           | 90                                                                                   |
| $\beta/^\circ$                            | 90                                                                                   |
| $\gamma/^\circ$                           | 90                                                                                   |
| Volume/Å <sup>3</sup>                     | 11416.5(12)                                                                          |
| Z                                         | 32                                                                                   |
| $\rho_{\text{calc}}/\text{g}/\text{cm}^3$ | 1.682                                                                                |
| $\mu/\text{mm}^{-1}$                      | 2.717                                                                                |
| Reflections collected                     | 120177                                                                               |
| Goodness-of-fit on $F^2$                  | 1.126                                                                                |
| Final R indexes [ $ I  \geq 2\sigma(I)$ ] | $R_1 = 0.0165$ , $wR_2 = 0.0350$                                                     |
| Final R indexes [all data]                | $R_1 = 0.0174$ , $wR_2 = 0.0353$                                                     |

## II. ESI-MS for bimetallic Ti-Yb complex $\{[\text{Cp}_2\text{TiCl}][\text{YbCl}_3]\text{Cl}\}^-$

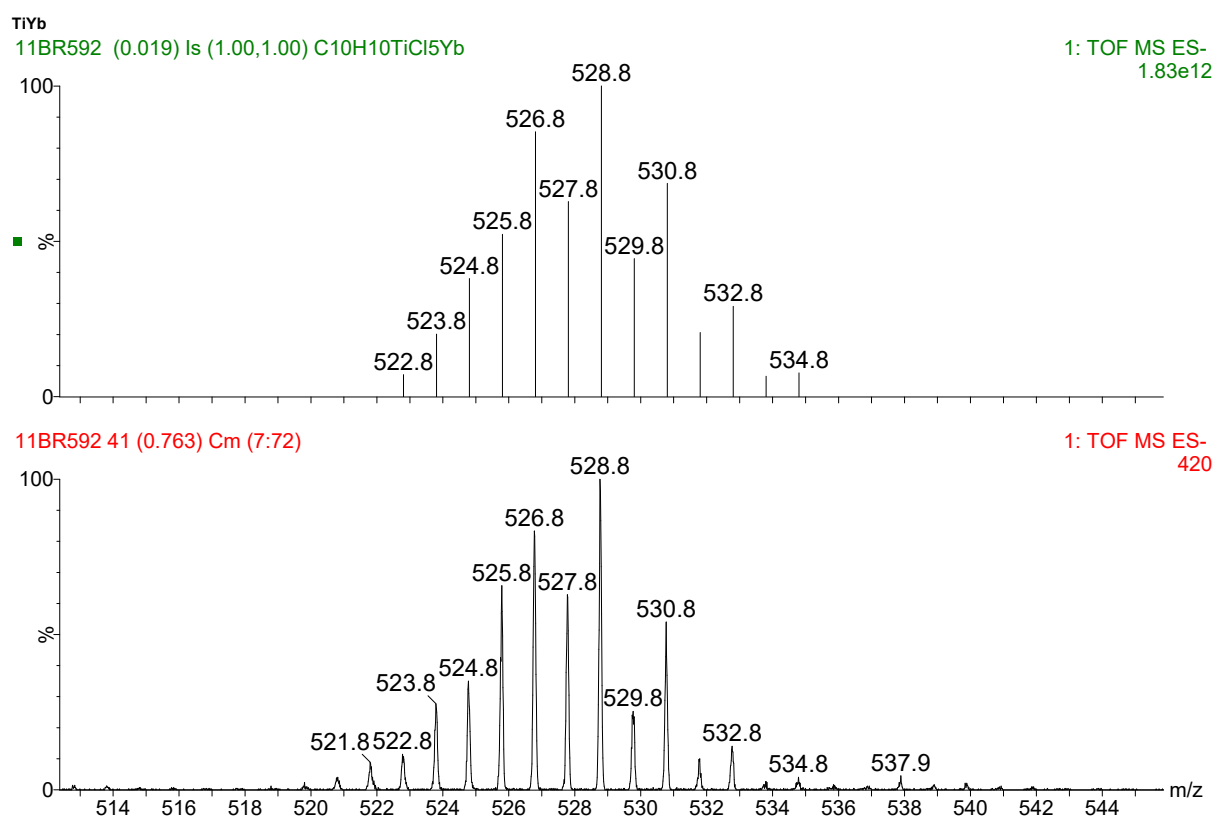

**Figure S1.** ESI-MS spectrum (negative mode) of bimetallic complex  $\{[\text{Cp}_2\text{TiCl}][\text{YbCl}_3]\text{Cl}\}^-$ : calculated (top) and observed (bottom) isotope distribution.

### III. EPR spectra

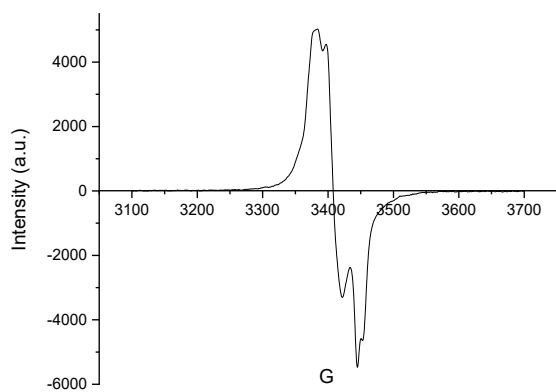

**Figure S2.** EPR spectra at 150 K of reaction:  $\text{Cp}_2\text{TiCl}_2 + \text{Yb}$  in THF

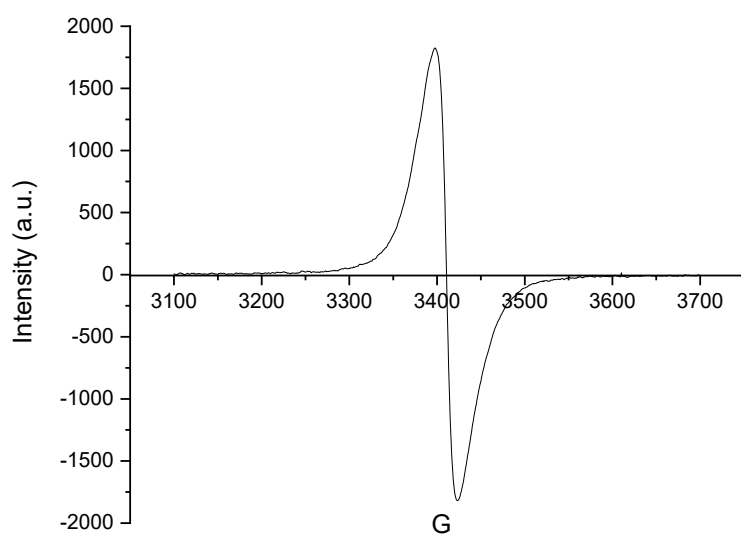

**Figure S3.** EPR spectra at 150 K of reaction:  $\text{Cp}_2\text{TiCl}_2 + \text{Sm}$  in THF
